# Supplementary material for: Intraperitoneal immunotherapy with T cells stably and transiently expressing anti-EpCAM CAR in xenograft models of peritoneal carcinomatosis
Source: PubMed Central journal article supplement (PMC5355119; doi:10.18632/oncotarget.14592), 2017-01-10
Supplement: oncotarget-08-13545-s001.pdf [file oncotarget-08-13545-s001.pdf]

## Intraperitoneal immunotherapy with T cells stably and transiently expressing anti-EpCAM cAR in xenograft models of peritoneal carcinomatosis

### Supplementary Materials

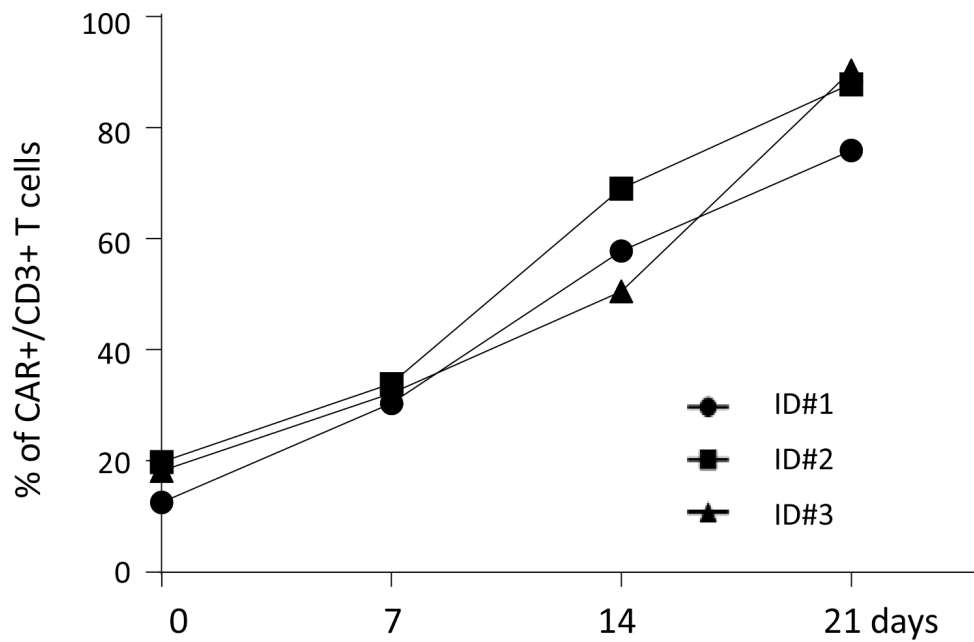

**Supplementary Figure 1: Expansion of EpCAM-specific CART cells.** CD3+CAR+ T cells increase over the co-culturing with K562A-EpCAM aAPCs. Results from three different PBMC samples are shown.

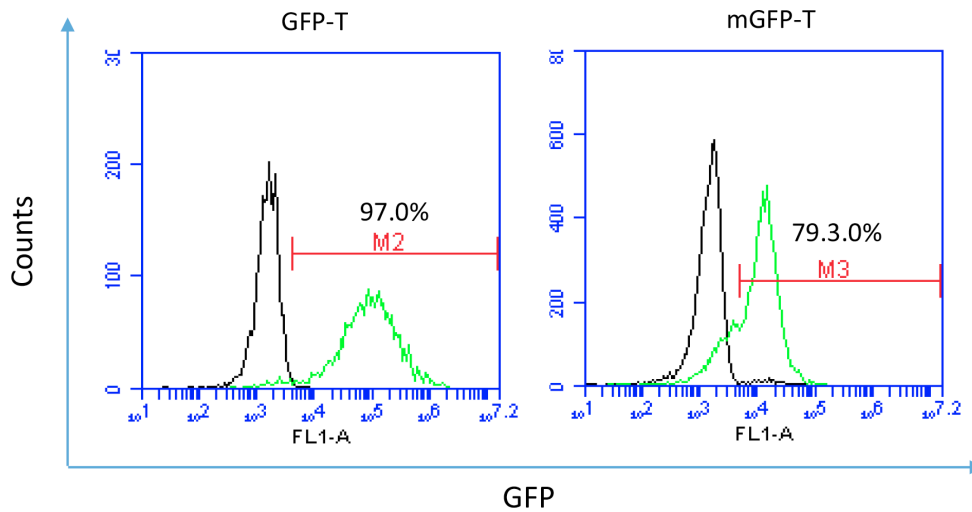

**Supplementary Figure 2: The electroporation efficiency in T cells.** The cells were transfected with normal GFP mRNA for cytoplasm expression and mGFPmRNA CAR for membrane expression. GFP expression was examined by flow cytometry.

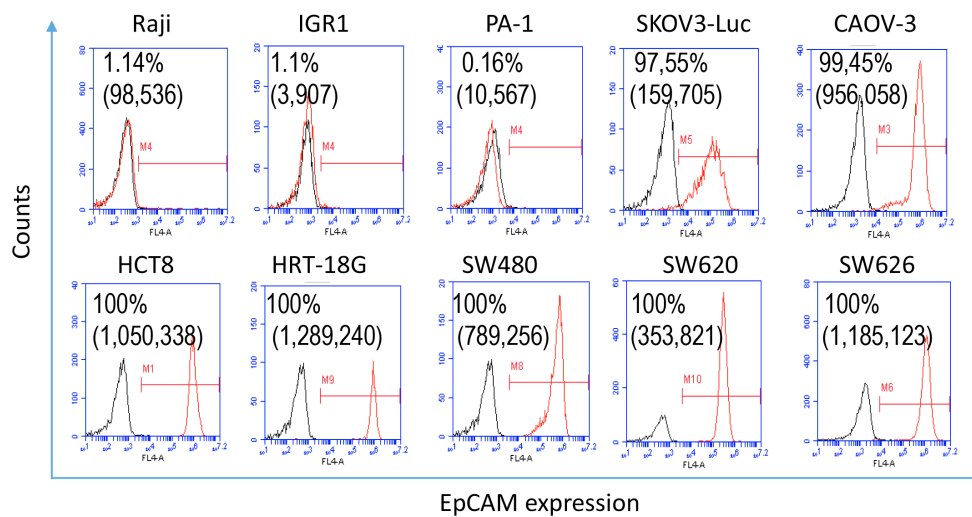

**Supplementary Figure 3: EpCAM expression in various types of tumor cell lines.** Human lymphoma line Raji, melanoma line IGR1, ovarian cancer lines PA-1, SKOV3-Luc and CAOV3, and colorectal cancer lines HCT8, HRT-18G, SW480, SW620 and SW626 were tested. Percentage positive cells (%) and mean fluorescence intensity (MFI) values are shown.

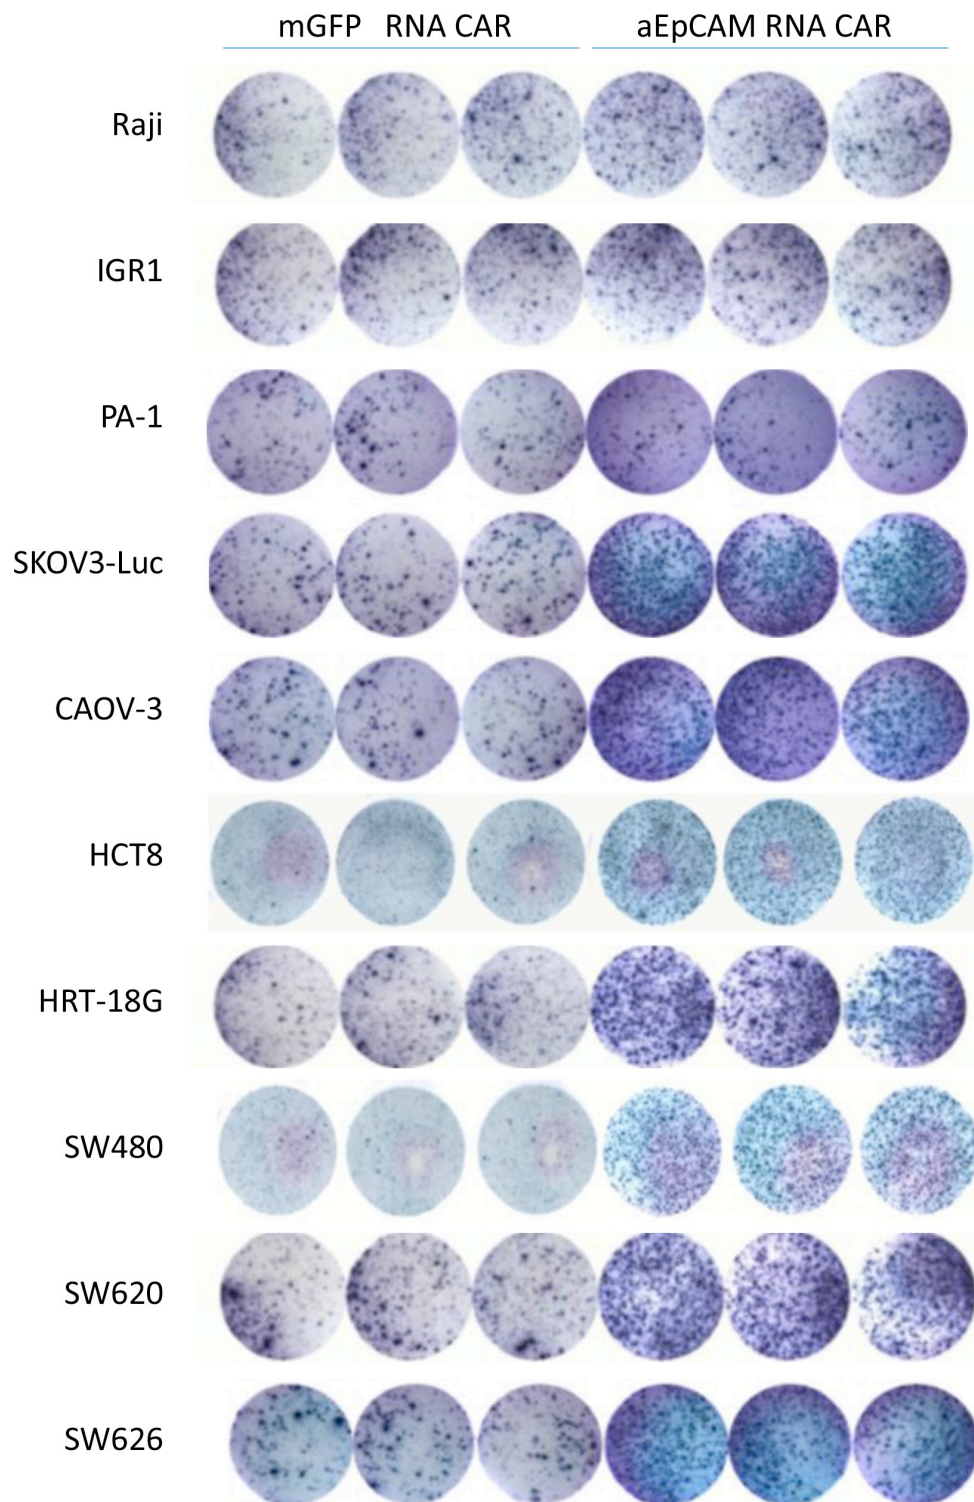

**Supplementary Figure 4: IFN $\gamma$  secretion triggered by tumor antigen-specific recognition of anti-EpCAM RNA CARs as determined by IFN $\gamma$  ELISPOT assay.** T cells were electroporated with mGFP RNA CAR or EpCAM-specific RNA CAR and co-cultured with indicated target tumor cells overnight before ELISPOT assay. Images from the plate scan of the ELISPOT assay are shown.

| A | Cell line_BV Transduction | EpCAM% | EpCAM MFI |
|---|---------------------------|--------|-----------|
|   | SW480 WT                  | 100%   | 789,256   |
|   | SW480_BV_Pax6             | 100%   | 1,076,844 |
|   | SW480_BV_EpCAM            | 100%   | 1,778,613 |
|   | HCT8 WT                   | 100%   | 1,050,338 |
|   | HCT8_BV_pax6              | 100%   | 1,139,722 |
|   | HCT8_BV_EpCAM             | 100%   | 1,481,640 |

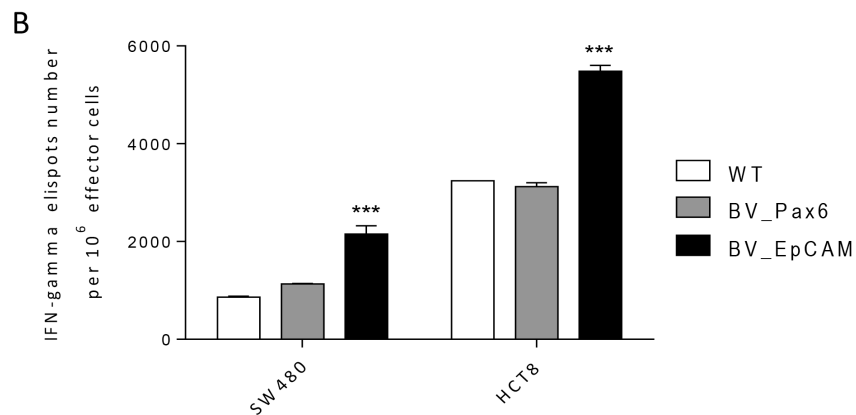

**Supplementary Figure 5: Increased IFN $\gamma$  secretion after transduction of tumor cells with a baculoviral vector expressing EpCAM (BV-EpCAM).** (A) Up-regulation of EpCAM expression on colon cancer cells by baculoviral transduction. Two human colon cancer cell lines, SW480 and HCT8, were transduced with a baculovirus EpCAM-expression vector (BV-EpCAM) or a control BV vector BVPax6. Transduction with BV-EpCAM did not change the percentage of EpCAM expression but resulted in much higher mean fluorescence intensities of EpCAM expression on the tumor cells. (B) IFN $\gamma$  secretion. One day after transduction, the tumor cells were mixed with T cells electroporated with anti- EpCAM mRNA CARs and co-cultured overnight before IFN $\gamma$  ELISPOT assay.

### PBS

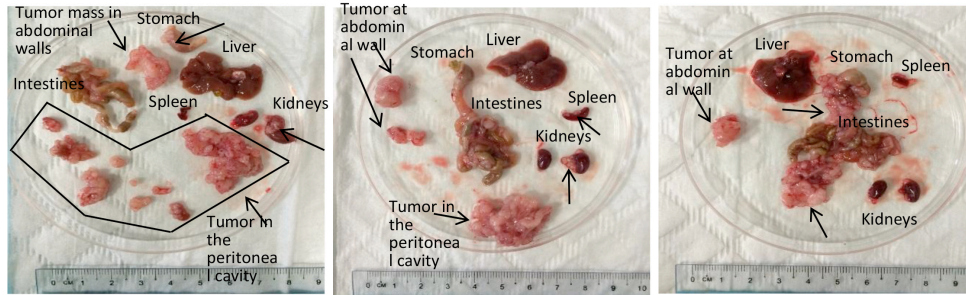

### mGFP RNA CAR

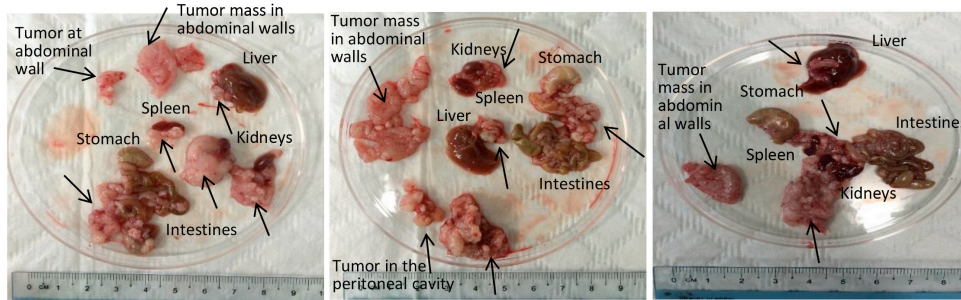

### aEpCAM RNA CAR

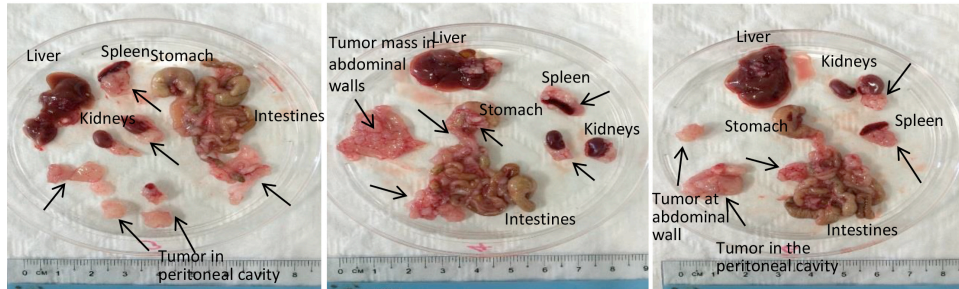

**Supplementary Figure 6: Autopsy of the euthanized animals tested in Figure 7C.** Large tumors scattered all over the peritoneal cavity were found, surrounding the pancreatic area, spleen, kidneys, liver and intestines. Masses of necrotic tissues in the abdominal wall were also noticed some of the euthanized mice. Samples from 3 mice per group are shown.
